# Supplementary material for: Diametric effects of autism tendencies and psychosis proneness on attention control irrespective of task demands
Source: PubMed Central journal article supplement (PMC5981437; doi:10.1038/s41598-018-26821-7), 2018-05-31
Supplement: 41598_2018_26821_MOESM1_ESM.pdf [file 41598_2018_26821_MOESM1_ESM.pdf]

**Title:** Diametric effects of autism tendencies and psychosis proneness on attention control  
irrespective of task demands

**Authors:** Ahmad Abu-Akel<sup>1\*</sup>, Ian Apperly<sup>2</sup>, Mayra Muller Spaniol<sup>3</sup>, Joy J. Geng<sup>4,5</sup>, Carmel Mevorach<sup>2,6\*</sup>

**Affiliations:**

<sup>1</sup>Institute of Psychology, University of Lausanne, Lausanne 1015, Switzerland

<sup>2</sup>School of Psychology, University of Birmingham, Birmingham B15 2TT, UK

<sup>3</sup>Developmental Disorders Program, Universidade Presbiteriana Mackenzie, São Paulo 01302-907,  
Brazil

<sup>4</sup>Department of Psychology, University of California Davis, Davis, California 95616, USA

<sup>5</sup>Center for Mind and Brain, University of California Davis, Davis, California 95616, USA

<sup>6</sup>Center for Human Brain Health, University of Birmingham, Birmingham B15 2TT, UK

\* Correspondence and requests for materials should be addressed to: A.A. (email:  
ahmad.abuakel@unil.ch) or to C.M. (email: C.Mevorach@bham.ac.uk).

## Supplementary Information

### Performance on the morphed face-discrimination task (Study 1)

Figure 1S presents the participants' performance on the morphed face-discrimination task during the male and female pair conditions.

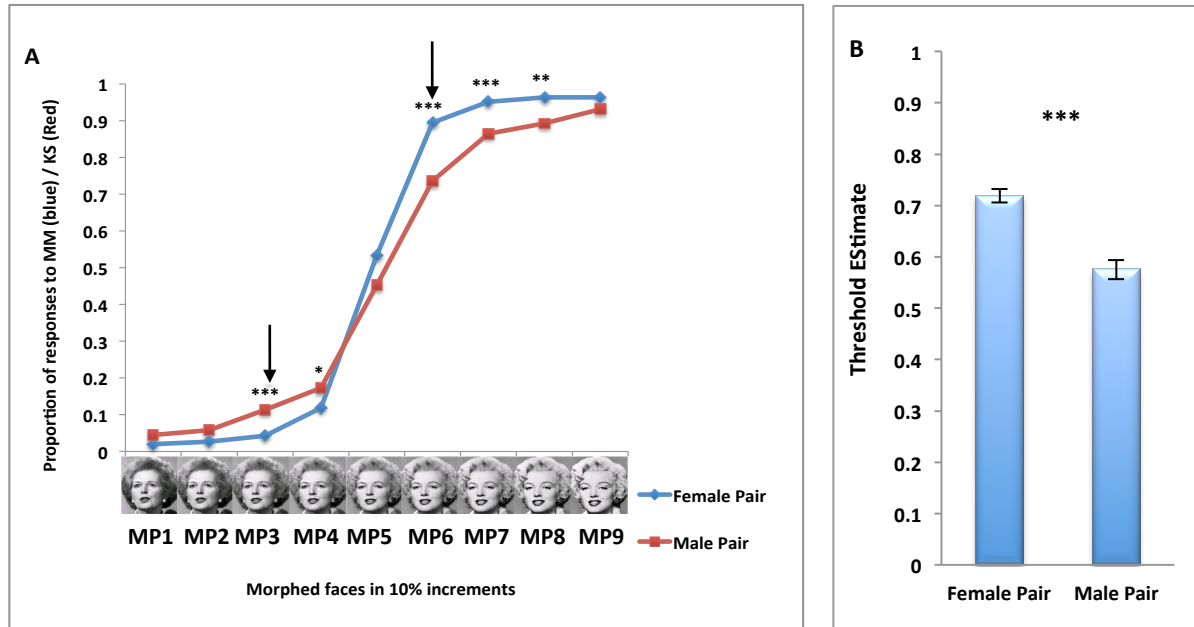

**Figure 1S.** Performance on the morphed faces-discrimination task during the male and female pair conditions. **Panel A** shows the results of the identity-classification task at all morph levels of the male and female pair condition. Comparisons between the two conditions revealed significant differences for morphs 3, 4, 6-8 (all  $t_{(df=57)} > 2.41$ , all  $p$ s  $< 0.019$ , Hedge's  $g = 0.10$ – $0.90$ ). **Panel B** shows the results from the face-scene distractor threshold task during the female and male pair conditions. Mean threshold estimates are higher in the female versus the male pair condition ( $t_{(df=57)} = 8.76$ ,  $p < 0.001$ , Hedge's  $g = 1.18$ ). The pattern of results suggests that discriminating between the male pair was significantly more difficult than the female pair. Black arrows indicate the set of pairs used in the face-scene distractor threshold task. Error bars represent SEM. \*  $p < 0.05$ ; \*\*  $p < 0.01$ ; \*\*\*  $p < 0.001$ .

Note: The images of MT and MM were adapted with permission from Springer Nature [Rotshtein, P., et al. 2005. Morphing Marilyn into Maggie dissociates physical and identity face representations in the brain. *Nature Neuroscience* 8, 107-113]. Morphing sequence for the male pair could not be displayed due to copyright restrictions.

### **Performance on the visual search task (Study 2)**

The main outcome measure in this task is saliency benefit, that is, the benefit gained from the presence of the salient (i.e. higher contrast) non-target compared with the similar non-target. To ascertain the benefit gained in the salient versus the similar condition, we conducted a series of repeated measures analyses of variance for the overall sample (N=67) in terms of accuracy, reaction time (RT), as well as in terms of RT/proportion correct. The analyses show that, overall, participants are more accurate ( $F(1, 67) = 11.10, p = 0.001, \eta_p^2 = 0.144$ ; Figure 2SA), faster ( $F(1, 67) = 22.38, p < 0.001, \eta_p^2 = 0.254$ ; Figure 2SB), and have lower RT/proportion correct scores ( $F(1, 67) = 27.61, p < 0.001, \eta_p^2 = .295$ ; Figure 2SC) in the salient versus the similar condition. These findings confirm the benefit rendered by the presence of the salient non-target element.

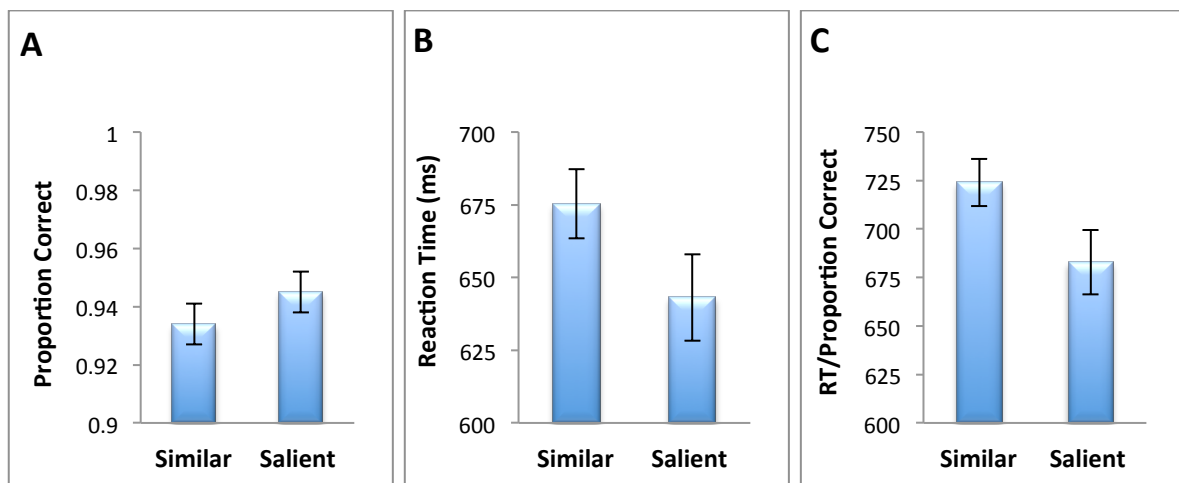

**Figure 2S.** Overall performance in terms of accuracy, reaction time and reaction time/proportion correct on the similar versus the salient conditions of the visual search task. **Panel A** shows the performance in terms of accuracy. **Panel B** shows the performance in terms of reaction time. **Panel C** shows the performance in terms of reaction time/proportion correct. Bars represent SEM.
